# Supplementary material
Source: HighWire-hosted journal article supplement (https://erj.ersjournals.com/content/57/6/2100066)
Supplement: inline-supplementary-material-1 [file inline-supplementary-material-1.pdf]

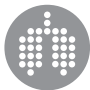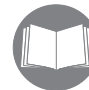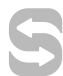

SHAREABLE PDF

# The coming-of-age of bedaquiline: a tale with an open ending

Lorenzo Guglielmetti <sup>1,2,3</sup> and Francis Varaine<sup>3</sup>

**Affiliations:** <sup>1</sup>Sorbonne Université, INSERM, U1135, Centre d'Immunologie et des Maladies Infectieuses, Cimi-Paris, équipe 13, Paris, France. <sup>2</sup>APHP, Groupe Hospitalier Universitaire Sorbonne Université, Hôpital Pitié-Salpêtrière, Centre National de Référence des Mycobactéries et de la Résistance des Mycobactéries aux Antituberculeux, Paris, France. <sup>3</sup>Médecins Sans Frontières, Paris, France.

**Correspondence:** Lorenzo Guglielmetti, Laboratoire de Bactériologie-Hygiène, Faculté de Médecine Sorbonne Université, 91 Boulevard de l'hôpital, 75634 Paris Cedex 13, France. E-mail: [lorenzo.guglielmetti@aphp.fr](mailto:lorenzo.guglielmetti@aphp.fr)

 @ERSpublications

**Future strategic choices in the clinical development of bedaquiline should be guided by the need to generate high-quality evidence and ultimately improve outcomes of tuberculosis treatment, while preventing the emergence of drug resistance** <https://bit.ly/3iAOCZr>

**Cite this article as:** Guglielmetti L, Varaine F. The coming-of-age of bedaquiline: a tale with an open ending. *Eur Respir J* 2021; 57: 2100066 [<https://doi.org/10.1183/13993003.00066-2021>].

This single-page version can be shared freely online.

Bedaquiline can probably be considered the biggest breakthrough in tuberculosis drug development of the past decades. The first compound of a new anti-tuberculosis drug class, diarylquinolines, bedaquiline binds the mycobacterial ATP synthase, inducing major conformational changes and ultimately impacting the bacterial respiration pathway [1, 2]. After being developed in 2005 [3], bedaquiline showed promising results in phase II trials [4, 5], and was granted accelerated approval in 2012 by the US Food and Drug Administration (FDA) and conditional approval in 2014 by the European Medicines Agency. In the following years, the access to bedaquiline has progressively increased, from compassionate to programmatic use [6, 7], although at an insufficient pace. Between July 2015 and December 2019, 51098 patients received bedaquiline worldwide: although remarkable, this figure only represents 11% of those who are estimated to need it according to the most recent recommendations by the World Health Organization (WHO) [8].
